# Supplementary material
Source: Springer Nature journal article supplement (https://www.springermedizin.de/resource/supplementary/13256_2011_2067_MOESM2_ESM.pdf/9649792)

### Blood pressure versus days of conservation

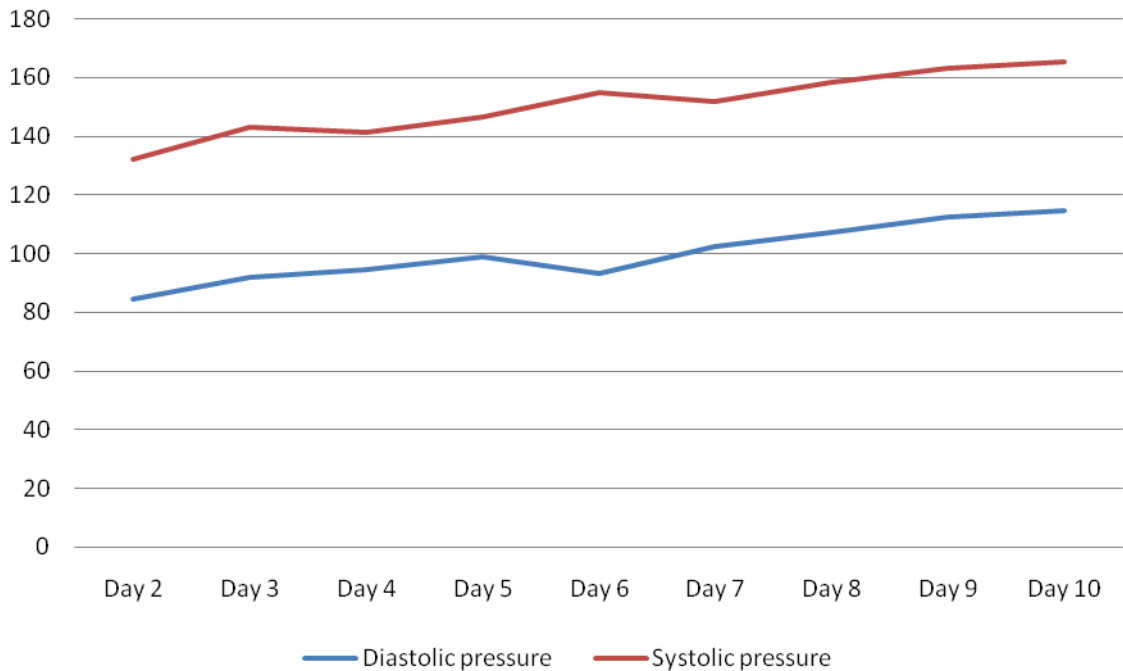

Supplement: MOESM2 [file 9649792]
